# Supplementary material
Source: PubMed Central journal article supplement (PMC4724642)
Supplement: NIHMS732214-supplement-01.pdf [file NIHMS732214-supplement-01.pdf]

**Table S1. Active Clinical Trials for Epidermolysis Bullosa (June 2015)**

This Table provides a status update of current clinical trials in EB. The authors have attempted to compile a comprehensive list but apologise to investigators and participants for any additional clinical trials that are not shown (for updated website, see <http://www.badgem.org.uk/active-clinical-trials>).

|                                 |                                                                                                                                                                       |
|---------------------------------|-----------------------------------------------------------------------------------------------------------------------------------------------------------------------|
| Disease under investigation     | Epidermolysis bullosa                                                                                                                                                 |
| Study title                     | A phase I/II study evaluating allogeneic mesenchymal stromal cells in adults with recessive dystrophic epidermolysis bullosa.                                         |
| Study synopsis                  | A phase I/II study evaluating allogeneic mesenchymal stromal cells in adults with recessive dystrophic epidermolysis bullosa.                                         |
| Clinical trial registration no. | EudraCT Number: 2014-004500-30                                                                                                                                        |
| Country                         | United Kingdom                                                                                                                                                        |
| Date Registered                 | May 2015                                                                                                                                                              |
| Current Status                  | Ongoing                                                                                                                                                               |
| Disease under investigation     | Epidermolysis bullosa                                                                                                                                                 |
| Study title                     | Phase I study of COL7A1 gene-modified autologous fibroblasts in adults with recessive dystrophic epidermolysis bullosa.                                               |
| Study synopsis                  | A study to evaluate whether intradermal injections of COL7A1 gene-modified autologous fibroblasts are safe in adults with recessive dystrophic epidermolysis bullosa. |
| Clinical trial registration no. | EudraCT Number: 2014-004884-19                                                                                                                                        |
| Country                         | United Kingdom                                                                                                                                                        |
| Date Registered                 | May 2015                                                                                                                                                              |
| Current Status                  | Ongoing                                                                                                                                                               |
| Disease under investigation     | Epidermolysis bullosa                                                                                                                                                 |
| Study title                     | An open label, multi-center, extension study to evaluate the long-term safety of Zorblisa (SD-101-6.0) in patients with epidermolysis bullosa                         |
| Study synopsis                  | This study aims to evaluate the long-term safety of Zorblisa in patients with simplex, recessive dystrophic, and junctional non-herlitz epidermolysis bullosa         |
| Clinical trial registration no. | EudraCT Number: 2014-005679-96                                                                                                                                        |
| Country                         | Austria                                                                                                                                                               |
| Date Registered                 | February 2015                                                                                                                                                         |
| Current Status                  | Ongoing                                                                                                                                                               |

|                                 |                                                                                                                                                                                                                                       |
|---------------------------------|---------------------------------------------------------------------------------------------------------------------------------------------------------------------------------------------------------------------------------------|
| Disease under investigation     | Epidermolysis bullosa simplex                                                                                                                                                                                                         |
| Study title                     | Diacerein for the treatment of epidermolysis bullosa simplex                                                                                                                                                                          |
| Study synopsis                  | A placebo-controlled study to evaluate diacerein as treatment of epidermolysis bullosa simplex                                                                                                                                        |
| Clinical trial registration no. | EudraCT Number: 2013-002034-21                                                                                                                                                                                                        |
| Country                         | Austria                                                                                                                                                                                                                               |
| Date Registered                 | 1 August 2013                                                                                                                                                                                                                         |
| Current Status                  | Ongoing                                                                                                                                                                                                                               |
| Disease under investigation     | Epidermolysis bullosa                                                                                                                                                                                                                 |
| Study title                     | Comparative clinical trial, open label, multicenter, to evaluate the effectiveness and safety of anew therapy for grown chimeric skin treatment of cutaneous lesions of patients with epidermolysis bullosa (Translated from Spanish) |
| Study synopsis                  | To assess the efficacy of treatment by local application of chimeric cultured skin patches, versus the use of a non-adherent occlusive dressing. (Translated from Spanish)                                                            |
| Clinical trial registration no. | EudraCT Number: 2005-002329-30                                                                                                                                                                                                        |
| Country                         | Spain                                                                                                                                                                                                                                 |
| Date Registered                 | 15 March 2010                                                                                                                                                                                                                         |
| Current Status                  | Ongoing                                                                                                                                                                                                                               |
| Disease under investigation     | Recessive dystrophic epidermolysis bullosa                                                                                                                                                                                            |
| Study title                     | Bicentric, open and pilot study evaluating the efficiency and the tolerance of the photodynamic therapy in the treatment of epidermal dysplasia for patients affected by hereditary dystrophic epidermolysis bullosa                  |
| Study synopsis                  | The main objective of this study is to determine the efficiency of photodynamic therapy in the treatment of epidermal dysplasia for patients affected by dystrophic epidermolysis bullosa                                             |
| Clinical trial registration no. | NCT02004600                                                                                                                                                                                                                           |
| Country                         | France                                                                                                                                                                                                                                |
| Date Registered                 | 26 November 2013                                                                                                                                                                                                                      |
| Current Status                  | Ongoing                                                                                                                                                                                                                               |
| Disease under investigation     | Epidermolysis bullosa simplex and pachyonychia congenita                                                                                                                                                                              |
| Study title                     | Botulinum toxin A treatment in epidermolysis bullosa simplex and pachyonychia congenita-a double-blind placebo-controlled phase II proof of                                                                                           |

|                                 |                                                                                                                                                                                                         |
|---------------------------------|---------------------------------------------------------------------------------------------------------------------------------------------------------------------------------------------------------|
| Study synopsis                  | concept study<br>This is a phase II study to evaluate the use of Botulinum toxin A as a treatment of children and adult patients with epidermolysis bullosa simplex and pachyonychia congenita.         |
| Clinical trial registration no. | EudraCT Number: 2009-010763-17                                                                                                                                                                          |
| Country                         | Sweden                                                                                                                                                                                                  |
| Date registered                 | 20 March 2009                                                                                                                                                                                           |
| Current status                  | Ongoing                                                                                                                                                                                                 |
| Disease under investigation     | Epidermolysis bullosa (simplex, recessive dystrophic, junctional non Herlitz)                                                                                                                           |
| Study title                     | A Phase 3, multi-center, randomized, double-blind, placebo controlled study of the efficacy and safety of SD-101 cream in patients with epidermolysis bullosa                                           |
| Study synopsis                  | This is a phase III study to investigate the efficacy and safety of topical SD-101 cream in patients with epidermolysis bullosa.                                                                        |
| Clinical trial registration no. | EudraCT Number: 2014-002288-14<br>NCT02090283                                                                                                                                                           |
| Country                         | Austria; United States                                                                                                                                                                                  |
| Date registered                 | 12 March 2014                                                                                                                                                                                           |
| Current status                  | Ongoing, but not recruiting patient                                                                                                                                                                     |
| Disease under investigation     | Recessive dystrophic epidermolysis bullosa                                                                                                                                                              |
| Study title                     | Unrelated cord blood transplantation after reduced toxicity conditioning with mesenchymal stromal cell co-infusion in patients with severe epidermolysis bullosa                                        |
| Study synopsis                  | This is a phase II study to evaluate stem cell transplantation with cord blood and mesenchymal stem cells after reduced intensity conditioning for patients with severe forms of epidermolysis bullosa. |
| Clinical trial registration no. | EudraCT Number: 2012-000605-72                                                                                                                                                                          |
| Country                         | Netherlands                                                                                                                                                                                             |
| Date registered                 | 12 August 2013                                                                                                                                                                                          |
| Current status                  | Ongoing                                                                                                                                                                                                 |
| Disease under investigation     | Recessive dystrophic epidermolysis bullosa                                                                                                                                                              |
| Study title                     | Traitement des épidermolyses bulleuses dystrophiques héréditaires par l'épigallocatechine-3-gallate oral (Polyphenon E®)                                                                                |
| Study synopsis                  | The primary purpose of this study is to assess the efficacy of oral Polyphenon E in decreasing the                                                                                                      |

|                                 |                                                                                                                                                                                                                                                                                                                                                            |
|---------------------------------|------------------------------------------------------------------------------------------------------------------------------------------------------------------------------------------------------------------------------------------------------------------------------------------------------------------------------------------------------------|
| Clinical trial registration no. | number of cutaneous bullosa after four month of treatment.                                                                                                                                                                                                                                                                                                 |
| Country                         | EudraCT Number: 2009-012750-21                                                                                                                                                                                                                                                                                                                             |
| Date registered                 | France                                                                                                                                                                                                                                                                                                                                                     |
| Current status                  | 27 November 2009                                                                                                                                                                                                                                                                                                                                           |
|                                 | Ongoing                                                                                                                                                                                                                                                                                                                                                    |
| Disease under investigation     | Recessive dystrophic epidermolysis bullosa                                                                                                                                                                                                                                                                                                                 |
| Study title                     | A phase I single center trial of gene transfer for recessive dystrophic epidermolysis bullosa using the drug LZRSE-Col7A1 engineered autologous epidermal sheets (LEAES)                                                                                                                                                                                   |
| Study synopsis                  | The purpose of this study is to achieve proof-of-concept for this general approach to cell-based gene therapy in humans with recessive dystrophic epidermolysis bullosa.                                                                                                                                                                                   |
| Clinical trial registration no. | NCT01263379                                                                                                                                                                                                                                                                                                                                                |
| Country                         | United States                                                                                                                                                                                                                                                                                                                                              |
| Date registered                 | 15 December 2010                                                                                                                                                                                                                                                                                                                                           |
| Current status                  | Ongoing, recruiting                                                                                                                                                                                                                                                                                                                                        |
| Disease under investigation     | Epidermolysis bullosa                                                                                                                                                                                                                                                                                                                                      |
| Study title                     | Biochemical correction of severe epidermolysis bullosa by allogeneic stem cell transplantation                                                                                                                                                                                                                                                             |
| Study synopsis                  | The primary objective of this phase II study is to estimate the event-free survival rate by 1 year post-transplant with an event defined as a death or failure to have a demonstrable increase in collagen, laminin, integrin, keratin or plakin deposition by 1 year post-transplant or other biochemical, structural or physical measure of improvement. |
| Clinical trial registration no. | NCT01033552                                                                                                                                                                                                                                                                                                                                                |
| Country                         | United States                                                                                                                                                                                                                                                                                                                                              |
| Date registered                 | 14 December 2009                                                                                                                                                                                                                                                                                                                                           |
| Current status                  | Ongoing, recruiting                                                                                                                                                                                                                                                                                                                                        |
| Disease under investigation     | Epidermolysis bullosa                                                                                                                                                                                                                                                                                                                                      |
| Study title                     | A phase 3, multi-center, randomized, double-blind, placebo controlled study of the efficacy and safety of SD-101 cream in patients with epidermolysis bullosa                                                                                                                                                                                              |
| Study synopsis                  | To assess the efficacy and safety of SD-101-6.0 cream versus SD-101-0.0 (placebo) in the treatment of patients with epidermolysis bullosa.                                                                                                                                                                                                                 |
| Clinical trial registration no. | NCT02384460                                                                                                                                                                                                                                                                                                                                                |

|                                 |                                                                                                                                                                                                                      |
|---------------------------------|----------------------------------------------------------------------------------------------------------------------------------------------------------------------------------------------------------------------|
| Country                         | United States                                                                                                                                                                                                        |
| Date registered                 | 13 February 2015                                                                                                                                                                                                     |
| Current status                  | Ongoing, recruiting                                                                                                                                                                                                  |
| <hr/>                           |                                                                                                                                                                                                                      |
| Disease under investigation     | Epidermolysis bullosa                                                                                                                                                                                                |
| Study title                     | A comparative study of the healing of chronic skin ulcers of recessive dystrophic epidermolysis bullosa: Standard dressing versus amniotic membrane.                                                                 |
| Study synopsis                  | The aim of this study is to evaluate the efficacy of the amniotic membrane on the healing of chronic ulcers REBD on the percentage ulcerated surface re-epithelialised at 12 weeks (M3) from the start of treatment. |
| Clinical trial registration no. | NCT02286427                                                                                                                                                                                                          |
| Country                         | France                                                                                                                                                                                                               |
| Date registered                 | 5 November 2014                                                                                                                                                                                                      |
| Current status                  | Ongoing, recruiting                                                                                                                                                                                                  |
| <hr/>                           |                                                                                                                                                                                                                      |
| Disease under investigation     | Epidermolysis bullosa                                                                                                                                                                                                |
| Study title                     | Pilot study evaluating the efficiency and the tolerance of the PDT in the treatment of epidermal dysplasia for patients affected by hereditary DEB                                                                   |
| Study synopsis                  | The main objective of this study is to determine the efficiency of the photodynamic therapy in the treatment of epidermic dysplasias for patients affected by dystrophic epidermolysis bullosa (DEB).                |
| Clinical trial registration no. | NCT02004600                                                                                                                                                                                                          |
| Date registered                 | 26 November 2013                                                                                                                                                                                                     |
| Current status                  | Ongoing, not recruiting yet                                                                                                                                                                                          |
| <hr/>                           |                                                                                                                                                                                                                      |
| Disease under investigation     | Epidermolysis bullosa                                                                                                                                                                                                |
| Study title                     | Treatment of Dowling Meara Type of Epidermolysis Bullosa Simplex by Oral Erythromycin (Phase 3)                                                                                                                      |
| Study synopsis                  | The aim of this study is the evaluation of the efficiency of oral erythromycin to decrease the number of cutaneous blisters in severe EBS-DM patients from 6 months to 8 years old after 3 months of treatment.      |
| Clinical trial registration no. | <u>NCT01340235</u>                                                                                                                                                                                                   |
| Date registered                 | 11 April 2011                                                                                                                                                                                                        |
| Country                         | France                                                                                                                                                                                                               |
| Current status                  | Ongoing                                                                                                                                                                                                              |

|                                 |                                                                                                                                                                    |
|---------------------------------|--------------------------------------------------------------------------------------------------------------------------------------------------------------------|
| Disease under investigation     | Recessive dystrophic epidermolysis bullosa                                                                                                                         |
| Study title                     | Clinical research of bone marrow-derived mesenchymal stem cell transplantation for the patients with epidermolysis bullosa.                                        |
| Study synopsis                  | The aim of this study is the evaluation of the safety and therapeutic potential of intradermal injections of allogeneic mesenchymal stromal cells on wound healing |
| Clinical trial registration no. | UMIN000006723                                                                                                                                                      |
| Date registered                 | 14 November 2011                                                                                                                                                   |
| Country                         | Japan                                                                                                                                                              |
| Current status                  | Ongoing                                                                                                                                                            |
